# Supplementary material for: Untargeted metabolomic analysis using LC-TOF/MS and LC-MS/MS for revealing metabolic alterations linked to alcohol-induced hepatic steatosis in rat serum and plasma
Source: Royal Society of Chemistry journal article supplement (doi:10.1039/c5ra27910k), 2016-01-01
Supplement: c5ra27910k1.pdf [file c5ra27910k1.pdf]

1 **Supplementary materials**

2 Untargeted metabolomic analysis using LC–TOF/MS and LC–MS/MS for revealing  
3 metabolic alterations linked to alcohol-induced hepatic steatosis in rat serum and  
4 plasma

5 Huan Wu<sup>ab</sup> and Fang Feng<sup>\*abc</sup>

6

7

8 **Affiliation**

9 <sup>a</sup> Department of Pharmaceutical Analysis, China Pharmaceutical University, Nanjing  
10 210009, China

11 <sup>b</sup> Key Laboratory of Drug Quality Control and Pharmacovigilance (Ministry of  
12 Education), China Pharmaceutical University, Nanjing 210009, China

13 <sup>c</sup> State Key Laboratory of Natural Medicine, China Pharmaceutical University, Nanjing  
14 210009, China

15

16

17 **Correspondence**

18 Prof. Fang Feng. Postal address: Department of Pharmaceutical Analysis, China

19 Pharmaceutical University, TongJiaXiang No. 24, Nanjing 210009, China.

20 Tel.: +86 025 83271301. E-mail addresses: fengfang1@hotmail.com (F. Feng)

21 Supporting information Text S1

22 Parameter settings for XCMS processing depend on the instrument platform in which  
23 the data were acquired. The parameters as follows: centWave for feature detection  
24 ( $\Delta m/z = 5$  ppm, minimum peak width = 10 s, and maximum peak width = 60 s);  
25 obiwarp settings for retention-time correction (profStep = 0.5); and parameters for  
26 chromatogram alignment, including mzwid = 0.025, minfrac = 0.5, and bw = 5.

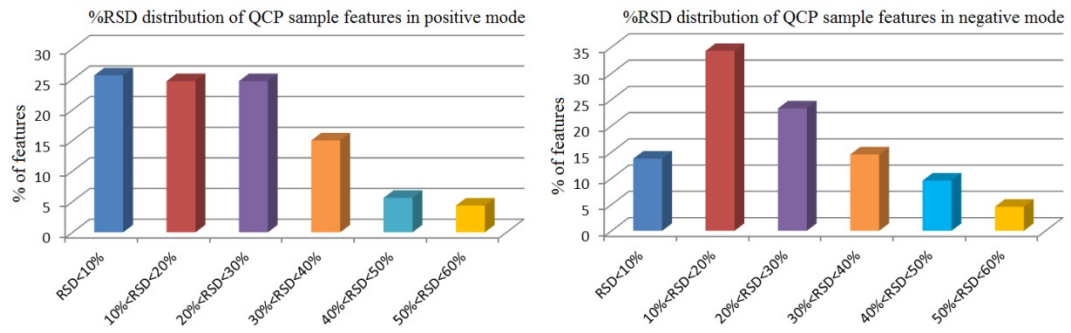

27

28 Fig.S1. The %RSD distribution of all features detected from QCP sample in positive  
 29 mode and negative mode, respectively. The 80%-rule was applied on the data and  
 30 features having %RSD values higher than 60% were excluded because these are likely  
 31 to have large RSDs and may not be a true reflection of the variation between  
 32 subjects.

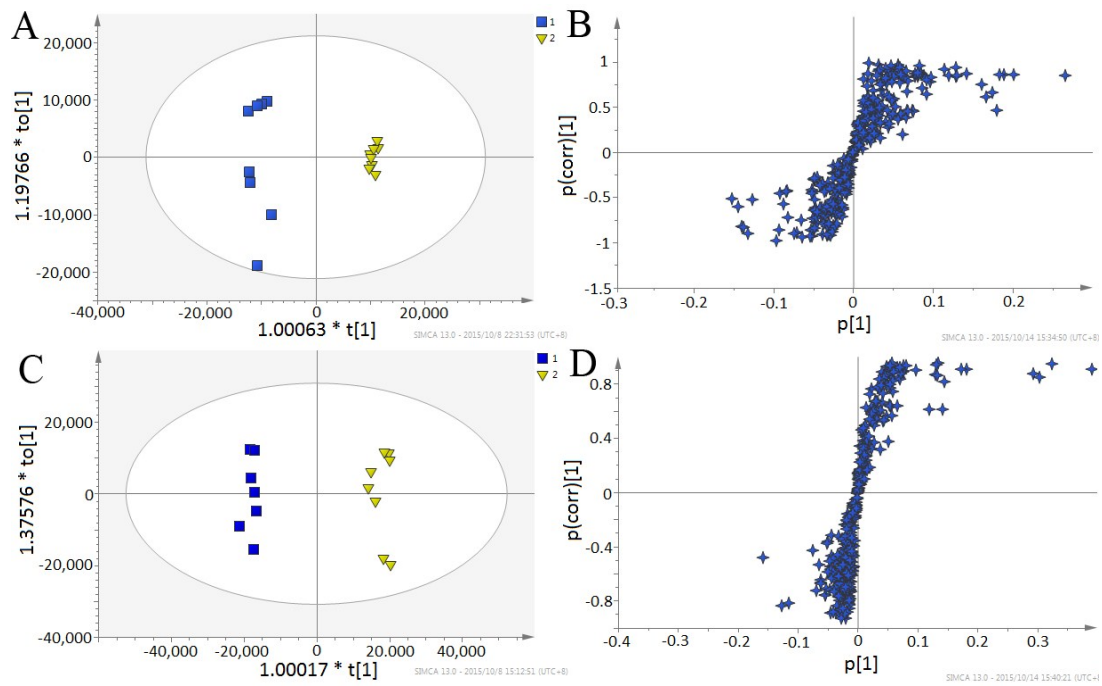

33

34 Fig. S2. Score plots of OPLS-DA in positive-ion mode (A) with the statistical  
 35 parameters ( $R^2X = 0.597$ ,  $R^2Y = 0.989$ ,  $Q^2 = 0.902$ ,  $p[\text{CV-ANOVA}] = 4.3 \times 10^{-4}$ ) and in  
 36 negative-ion mode (C) with the statistical parameters ( $R^2X = 0.760$ ,  $R^2Y = 0.984$ ,  $Q^2 =$   
 37  $0.957$ ,  $p[\text{CV-ANOVA}] = 1.2 \times 10^{-5}$ ) between the normal rat serum (blue squares) and  
 38 AHS rat serum (yellow inverted triangle). The corresponding S-plot from OPLS-DA  
 39 model of the two groups in positive-ion mode (B) and in negative-ion mode (D).

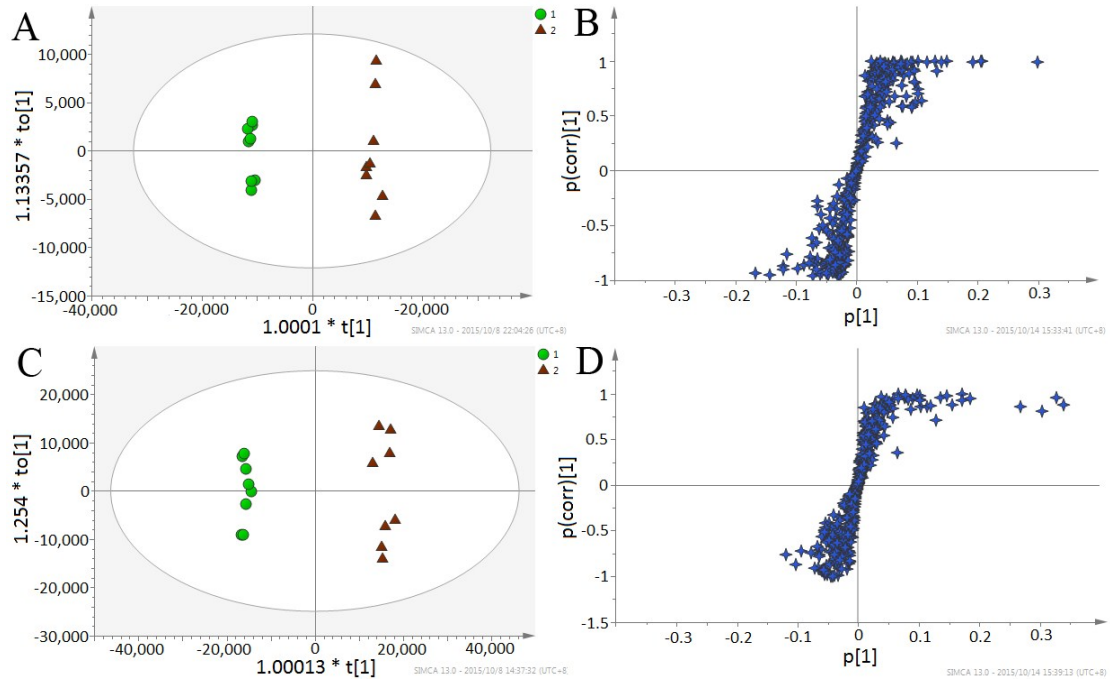

40

41 Fig. S3. Score plots of OPLS-DA in positive-ion mode (A) with the statistical  
 42 parameters ( $R^2X = 0.539$ ,  $R^2Y = 0.996$ ,  $Q^2 = 0.978$ ,  $p[\text{CV-ANOVA}] = 4.6 \times 10^{-9}$ ) and in  
 43 negative-ion mode (B) with the statistical parameters ( $R^2X = 0.741$ ,  $R^2Y = 0.994$ ,  $Q^2 =$   
 44  $0.967$ ,  $p[\text{CV-ANOVA}] = 3.5 \times 10^{-6}$ ) between the normal rat plasma (green dot) and  
 45 AHS rat plasma (brown triangle). The corresponding S-plot from OPLS-DA model of  
 46 the two groups in positive-ion mode (B) and in negative-ion mode (D).

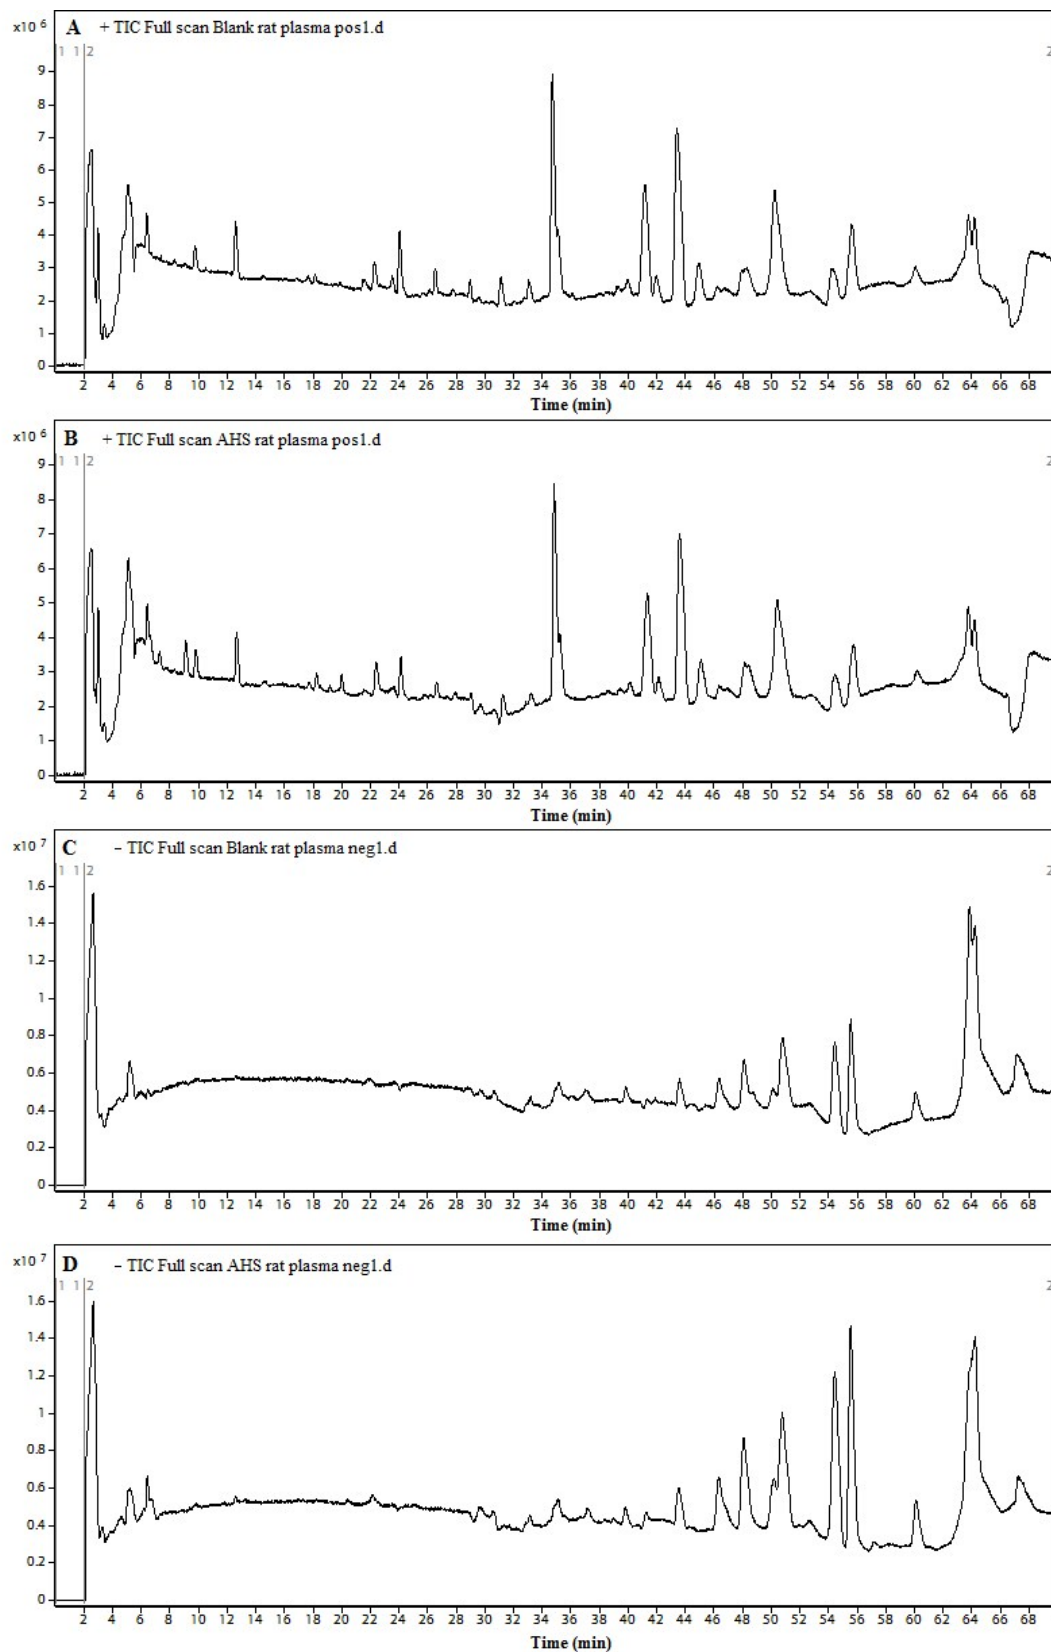

48

49 Fig. S4. HPLC-ESI-TOF/MS chromatograms of normal rat plasma and AHS rat plasma  
50 in positive-ion mode (A, B) and in negative-ion mode (C, D), respectively.

51

Table S1: OPLS-DA markers ( $t_R$ - $m/z$ ) of serum and plasma samples in positive-ion mode and negative-ion mode

| Features ( $t_R$ - $m/z$ ) | Adduct              | Formula                                                        | $M_w$ (Da) | Diff. (ppm) | Metabolite            | Chemical classe       | VIP  | Intensity response |
|----------------------------|---------------------|----------------------------------------------------------------|------------|-------------|-----------------------|-----------------------|------|--------------------|
| Positive-ion mode          |                     |                                                                |            |             |                       |                       |      |                    |
| 9.77-120.0811              | [M+H] <sup>+</sup>  | C <sub>8</sub> H <sub>10</sub> N                               | 120.0813   | -1.6        | Frag of Phe-Phe       | Peptide               | 3.65 | Δ                  |
| 31.21-453.1721             | -                   | -                                                              | -          | -           | DCP                   | Peptide               | 3.32 | Δ                  |
| 30.10-437.1983             | -                   | -                                                              | -          | -           | DCP                   | Peptide               | 3.31 | Δ                  |
| 9.79-313.1531              | [M+H] <sup>+</sup>  | C <sub>18</sub> H <sub>21</sub> N <sub>2</sub> O <sub>3</sub>  | 313.1552   | -6.7        | Phe-Phe               | Peptide               | 2.72 | Δ                  |
| 41.48-542.3242             | [M+Na] <sup>+</sup> | C <sub>26</sub> H <sub>50</sub> NO <sub>7</sub> PNa            | 542.3223   | 3.5         | LysoPC (18:2)         | Phospholipid          | 2.68 | ↑*                 |
| 45.18-522.3556             | [M+H] <sup>+</sup>  | C <sub>26</sub> H <sub>53</sub> NO <sub>7</sub> P              | 522.3560   | -0.8        | LysoPC (18:1)         | Phospholipid          | 2.36 | ↑*                 |
| 31.76-513.1842             | -                   | -                                                              | -          | -           | DCP                   | Peptide               | 2.32 | Δ                  |
| 31.26-504.3089             | -                   | -                                                              | -          | -           | DCP                   | peptide               | 2.09 | Δ                  |
| 38.10-539.3192             | -                   | -                                                              | -          | -           | DCP                   | peptide               | 1.83 | Δ                  |
| 59.02-782.5683             | [M+H] <sup>+</sup>  | C <sub>44</sub> H <sub>81</sub> NO <sub>8</sub> P              | 782.5700   | -2.2        | PC (36:4)             | Phospholipid          | 1.55 | ↑*                 |
| 43.71-518.3235             | [M+Na] <sup>+</sup> | C <sub>24</sub> H <sub>50</sub> NO <sub>7</sub> PNa            | 518.3223   | 2.3         | LysoPC (16:0)         | Phospholipid          | 1.51 | ↑*                 |
| 50.63-524.3713             | [M+H] <sup>+</sup>  | C <sub>26</sub> H <sub>55</sub> NO <sub>7</sub> P              | 524.3716   | -0.6        | LysoPC (18:0)         | Phospholipid          | 1.33 | ↑*                 |
| 50.81-303.2313             | [M+H] <sup>+</sup>  | C <sub>20</sub> H <sub>31</sub> O <sub>2</sub>                 | 303.2324   | -3.6        | Eicosapentaenoic acid | Fatty acid            | 1.27 | ↑*                 |
| 3.21-175.0244              | [M+Na] <sup>+</sup> | C <sub>5</sub> H <sub>4</sub> N <sub>4</sub> O <sub>2</sub> Na | 175.0232   | 6.9         | Xanthine              | Heterocyclic compound | 1.17 | ↑*                 |
| 5.94-159.0274              | [M+Na] <sup>+</sup> | C <sub>5</sub> H <sub>4</sub> N <sub>4</sub> ONa               | 159.0283   | -5.7        | Hypoxanthine          | Heterocyclic compound | 1.14 | ↑*                 |
| 59.01-758.5691             | [M+H] <sup>+</sup>  | C <sub>42</sub> H <sub>81</sub> NO <sub>8</sub> P              | 758.5700   | -1.2        | PC (34:2)             | Phospholipid          | 1.06 | ↑*                 |
| Negative-ion mode          |                     |                                                                |            |             |                       |                       |      |                    |

|                |                                      |                                                               |          |      |                       |              |      |    |
|----------------|--------------------------------------|---------------------------------------------------------------|----------|------|-----------------------|--------------|------|----|
| 9.79-311.1402  | [M-H] <sup>-</sup>                   | C <sub>18</sub> H <sub>19</sub> N <sub>2</sub> O <sub>3</sub> | 311.1396 | 1.9  | Phe-Phe               | Peptide      | 2.69 | Δ  |
| 51.01-279.1978 | [M-H] <sup>-</sup>                   | C <sub>17</sub> H <sub>27</sub> O <sub>3</sub>                | 279.1960 | 6.5  | 12-HHT                | Fatty acid   | 2.43 | ↑* |
| 44.95-556.3043 | [M-H] <sup>-</sup>                   | C <sub>28</sub> H <sub>47</sub> NO <sub>8</sub> P             | 556.3039 | 0.7  | LysoPC (20:4)         | Phospholipid | 2.33 | ↑* |
| 55.71-363.2553 | [M+CH <sub>3</sub> COO] <sup>-</sup> | C <sub>22</sub> H <sub>35</sub> O <sub>4</sub>                | 363.2535 | 5.0  | Arachidonic acid      | Fatty acid   | 2.07 | ↑* |
| 35.28-317.2127 | [M-H] <sup>-</sup>                   | C <sub>20</sub> H <sub>29</sub> O <sub>3</sub>                | 317.2117 | 3.2  | 12-HEPE               | Fatty acid   | 2.01 | ↑* |
| 46.52-301.2173 | [M-H] <sup>-</sup>                   | C <sub>20</sub> H <sub>29</sub> O <sub>2</sub>                | 301.2168 | 1.7  | Eicosapentaenoic acid | Fatty acid   | 1.87 | ↑* |
| 38.44-319.2293 | [M-H] <sup>-</sup>                   | C <sub>20</sub> H <sub>31</sub> O <sub>3</sub>                | 319.2273 | 6.3  | 8-HETE                | Fatty acid   | 1.81 | ↓* |
| 48.31-335.2236 | [M-H] <sup>-</sup>                   | C <sub>20</sub> H <sub>31</sub> O <sub>4</sub>                | 335.2222 | 4.2  | 5,15-diHETE           | Fatty acid   | 1.72 | ↓* |
| 43.61-554.3546 | [M+CH <sub>3</sub> COO] <sup>-</sup> | C <sub>26</sub> H <sub>53</sub> NO <sub>9</sub> P             | 554.3458 | -2.2 | LysoPC (16:0)         | Phospholipid | 1.62 | ↑* |
| 41.16-580.3608 | [M+CH <sub>3</sub> COO] <sup>-</sup> | C <sub>28</sub> H <sub>55</sub> NO <sub>9</sub> P             | 580.3614 | -1.0 | LysoPC (18:1)         | Phospholipid | 1.57 | ↑* |
| 54.78-337.2401 | [M-H] <sup>-</sup>                   | C <sub>20</sub> H <sub>33</sub> O <sub>4</sub>                | 337.2379 | 6.5  | 5,6-diHETrE           | Fatty acid   | 1.55 | ↑* |
| 39.54-552.3312 | [M+CH <sub>3</sub> COO] <sup>-</sup> | C <sub>26</sub> H <sub>51</sub> NO <sub>9</sub> P             | 552.3301 | 2.0  | LysoPC (16:1)         | Phospholipid | 1.36 | ↑* |
| 58.95-834.6011 | [M-H] <sup>-</sup>                   | C <sub>48</sub> H <sub>85</sub> NO <sub>8</sub> P             | 834.6013 | -0.2 | PC (40:5)             | Phospholipid | 1.29 | ↑* |
| 43.55-480.3094 | [M-H] <sup>-</sup>                   | C <sub>23</sub> H <sub>47</sub> NO <sub>7</sub> P             | 480.3090 | 0.3  | LysoPC (15:0)         | Phospholipid | 1.11 | ↑* |
| 50.41-508.3417 | [M-H] <sup>-</sup>                   | C <sub>25</sub> H <sub>51</sub> NO <sub>7</sub> P             | 508.3403 | 2.8  | LysoPC (17:0)         | Phospholipid | 1.02 | ↑* |

Abbreviations:  $M_w$ , monoisotopic weight; VIP, variable importance on projection; Phe, phenylalanine; DCP, doubly charged peptide; LysoPC, lysophosphatidylcholine; PC, phosphatidylcholine; HHT, hydroxyheptadecatrienoic acid; HEPE, hydroxyeicosapentaenoic acid; HETE, hydroxyeicosatetraenoic acid; diHETE, dihydroxyeicosatetraenoic acid; diHETrE, dihydroxyeicosatrienoic acid.

\*: Response compared to heparinized plasma samples.

Δ: Detected only in serum.
